# Supplementary material for: Differential remodelling of mitochondrial subpopulations and mitochondrial dysfunction are a feature of early stage diabetes
Source: PubMed Central journal article supplement (PMC8770458; doi:10.1038/s41598-022-04929-1), 2022-01-19

**Differential remodelling of mitochondrial subpopulations and mitochondrial dysfunction are a feature of early stage diabetes**

**Rajab et al**

**SUPPLEMENTAL INFORMATION**

**Western blots:**

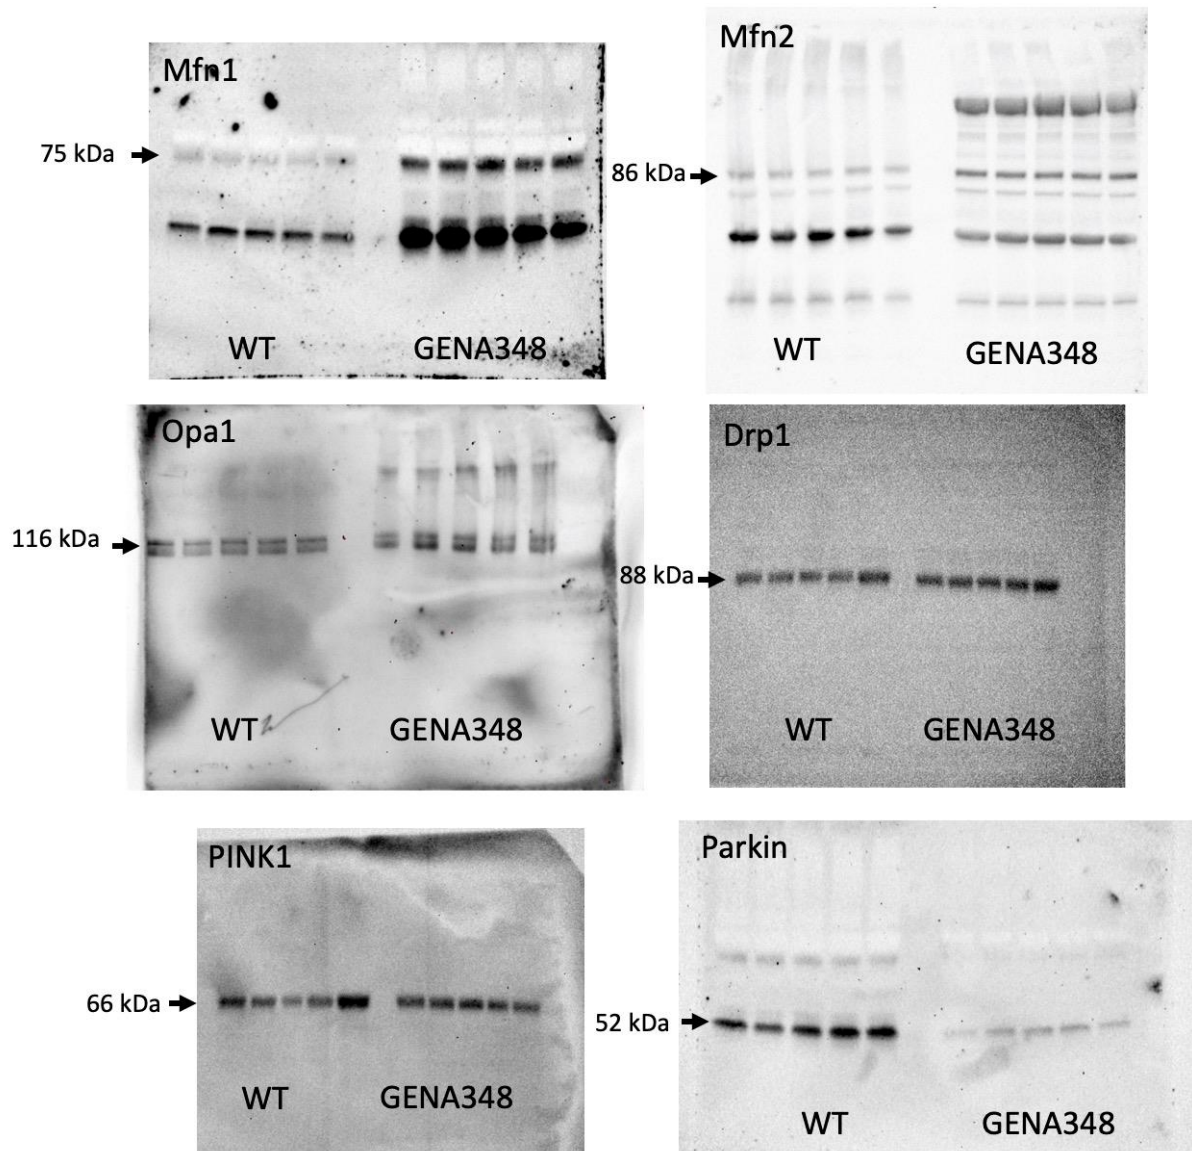

Supplement: 41598_2022_4929_MOESM1_ESM.pdf [file 41598_2022_4929_MOESM1_ESM.pdf]
